# Supplementary material
Source: Springer Nature journal article supplement (https://www.springermedizin.de/resource/supplementary/12982_2006_42_MOESM2_ESM.pdf/9604356)

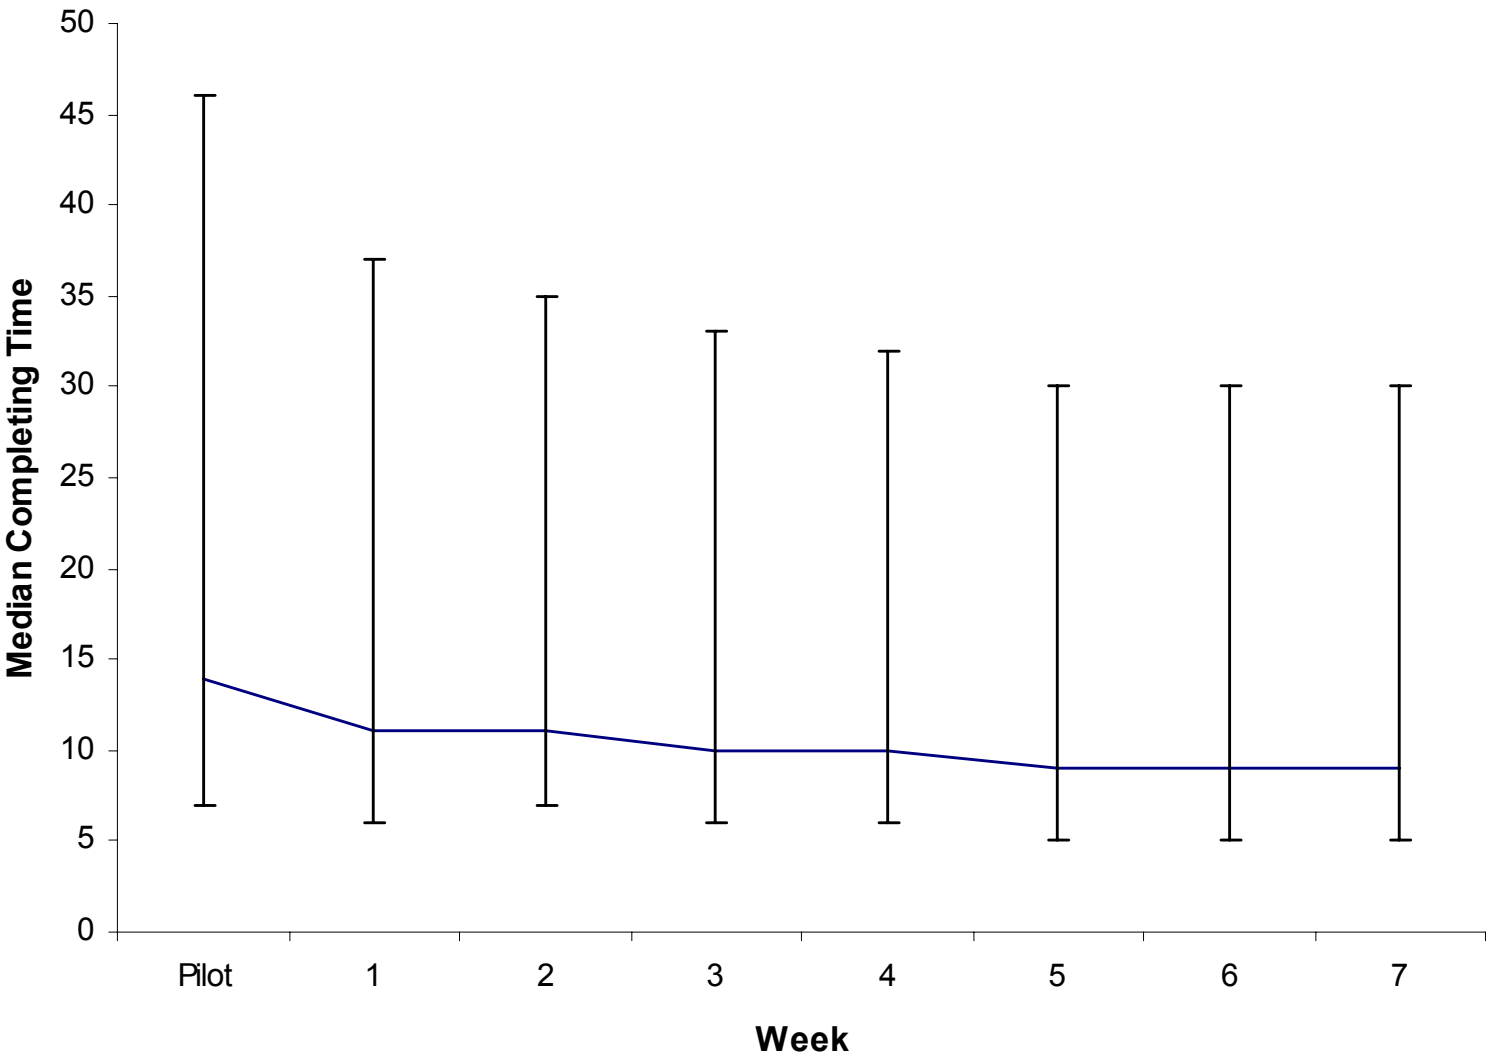

Supplement: MOESM2 [file 9604356]
